# Supplementary material for: Metabolic effects of dopamine agonists in patients with prolactinomas: a systematic review and meta-analysis
Source: PubMed Central journal article supplement — Endocr Connect. 2019 Sep 13;8(10):1395–404. doi: 10.1530/EC-19-0286 (PMC6826167; doi:10.1530/ec-19-0286), 2019-09-13
Supplement: supplementary_table_1.pdf [file supplementary_table_1.pdf]

**Table S1.** Subgroup analysis for primary outcome.

|                              | Number of participants (number of studies) | Estimate SMD (95. CI; p-value; I <sup>2</sup> )         | Test of heterogeneity |
|------------------------------|--------------------------------------------|---------------------------------------------------------|-----------------------|
| <b>Duration of follow-up</b> |                                            |                                                         |                       |
| < 6 months                   | 171 (9)                                    | -0.16 (-0.28 to -0.04; p = 0.008; I <sup>2</sup> = 0%)  | 0.53                  |
| >6 months                    | 189 (4)                                    | -0.29 (-0.69 to 0.11; p = 0.15; I <sup>2</sup> = 91%)   |                       |
| <b>Male participants</b>     |                                            |                                                         |                       |
| < 22%                        | 180 (6)                                    | -0.10 (-0.23 to 0.04; p = 0.16; I <sup>2</sup> = 0%)    | 0.19                  |
| >22%                         | 159 (6)                                    | -0.31 (-0.61 to -0.02; p = 0.04; I <sup>2</sup> = 84%)  |                       |
| <b>Prolactin</b>             |                                            |                                                         |                       |
| Low                          | 388 (7)                                    | -0.09 (-0.16 to 0.06; p = 0.35; I <sup>2</sup> = 0%)    | 0.04                  |
| High                         | 332 (6)                                    | -0.33 (-0.58 to -0.09; p = 0.008; I <sup>2</sup> = 72%) |                       |
| <b>Macroprolactinoma</b>     |                                            |                                                         |                       |
| ≤ 30 %                       | 118 (6)                                    | -0.11 (-0.25 to 0.04; p = 0.14; I <sup>2</sup> = 0%)    | 0.63                  |
| > 30 %                       | 183 (5)                                    | -0.34 (-0.69 to 0.01; p = 0.22; I <sup>2</sup> = 87%)   |                       |
| <b>Random error</b>          |                                            |                                                         |                       |
| Prospective                  | 227 (9)                                    | -0.26 (-0.44 to -0.07; p = 0.006; I <sup>2</sup> = 70%) | 0.27                  |
| Retrospective                | 133 (4)                                    | -0.09 (-0.32 to 0.15; p = 0.47; I <sup>2</sup> = 64%)   |                       |
| <b>Risk of bias</b>          |                                            |                                                         |                       |
| Less                         | 140 (5)                                    | -0.30 (-0.56 to -0.05; p = 0.02; I <sup>2</sup> = 70%)  | 0.31                  |
| High                         | 220 (8)                                    | -0.14 (-0.32 to 0.04; p = 0.12; I <sup>2</sup> = 62%)   |                       |
