# Supplementary material for: Metabolic effects of dopamine agonists in patients with prolactinomas: a systematic review and meta-analysis
Source: PubMed Central journal article supplement — Endocr Connect. 2019 Sep 13;8(10):1395–404. doi: 10.1530/EC-19-0286 (PMC6826167; doi:10.1530/ec-19-0286), 2019-09-13
Supplement: supplementary_table_2.pdf [file supplementary_table_2.pdf]

Dopamine agonists in prolactinoma

**Table S2.** Secondary outcomes

| Variable     | Number of studies (n) | Estimate, SMD (95% CI)                                  | Difference in mean (95% CI)  |
|--------------|-----------------------|---------------------------------------------------------|------------------------------|
| Weight       | 13 (720)              | -0.20 (-0.36 to -0.05; p = 0.01; I <sup>2</sup> = 71%)  |                              |
| BMI          | 12 (690)              | -0.22 (-0.38 to -0.05; p = 0.01; I <sup>2</sup> = 73%)  | -1.2 (-2.0 to -0.4), BMI     |
| Weight       | 1 (30)                | 0.00 (-0.39 to 0.39; p = 1.0; I <sup>2</sup> = 71%)     | 0.0 kg (-8.0 to 8.0), kg     |
| Waist        | 7 (424)               | -0.25 (-0.41 to -0.10; p = 0.001; I <sup>2</sup> = 49%) | -3.0 (-4.8 to -1.1) cm       |
| Cholesterol  | 11 (642)              | -0.50 (-0.70 to -0.31; p < 0.001; I <sup>2</sup> = 76%) | -0.5 (-0.7 to -0.3) mmol/L   |
| LDL          | 12 (674)              | -0.54 (-0.67 to -0.40; p < 0.001; I <sup>2</sup> = 61%) | -0.5 (-0.7 to -0.4) mmol/L   |
| TRG          | 12 (686)              | -0.32 (-0.54 to -0.10; p = 0.005; I <sup>2</sup> = 82%) | -0.2 (-0.4 to -0.1) mmol/L   |
| Glucose      | 11 (646)              | -0.34 (-0.54 to -0.15; p < 0.001; I <sup>2</sup> = 78%) | -0.2 (-0.4 to -0.1) mmol/L   |
| HOMA-IR      | 10 (485)              | -0.45 (-0.63 to -0.26; p < 0.001; I <sup>2</sup> = 69%) | -0.9 (-1.3 to -0.5)          |
| Insulin      | 9 (486)               | -0.54 (-0.87 to -0.20; p = 0.006; I <sup>2</sup> = 88%) | -9.1 (-13.2 to -5.1) pmol/L  |
| HbA1c        | 3 (110)               | -0.36 (-0.64 to -0.08; p = 0.01; I <sup>2</sup> = 67%)  | -3.5 (-6.7 to -0.3) mmol/mol |
| Testosterone | 4 (188)               | 1.18 (-0.70 to 1.66; p < 0.001; I <sup>2</sup> = 77%)   | 6.5 (2.0 to 7.4) nmol/L      |
| Estrogen     | 1 (16)                | 0.32 (-0.07 to 0.71; p = 0.11)                          | 20.2 (-4.0 to 44.4) ng/ml    |
| Estradiol    | 2 (72)                | 0.89 (-0.77 to 2.54; p = 0.29; I <sup>2</sup> = 96%)    | 17.8 (-15.4 to 50.0) pg/ml   |
| FSH          | 3 (198)               | 0.20 (0.05 to 0.36; p = 0.01; I <sup>2</sup> = 0%)      | 0.5 (0.1 to 0.9) IU/L        |
| LH           | 3 (198)               | 0.20 (0.02 to 0.38; p = 0.03; I <sup>2</sup> = 23%)     | 0.5 (0.2 to 0.9) IU/L        |
| hsCRP        | 4 (132)               | -0.31 (-0.62 to -0.004; p = 0.05; I <sup>2</sup> = 60%) | -1.0 (-1.4 to -0.5) mg/L     |
| Systolic BP  | 2 (36)                | -0.12 (-0.37 to 0.14; p = 0.36; I <sup>2</sup> = 0%)    | -2.1 (-6.4 to 2.1) mmHg      |
| Diastolic BP | 2 (36)                | -0.01 (-0.26 to 0.25; p = 0.97; I <sup>2</sup> = 0%)    | -0.2 (-2.9 to 3.2) mmHg      |
