# Supplementary material for: Metabolic effects of dopamine agonists in patients with prolactinomas: a systematic review and meta-analysis
Source: PubMed Central journal article supplement — Endocr Connect. 2019 Sep 13;8(10):1395–404. doi: 10.1530/EC-19-0286 (PMC6826167; doi:10.1530/ec-19-0286), 2019-09-13
Supplement: supplementary_table_3.pdf [file supplementary_table_3.pdf]

Dopamine agonists in prolactinoma

**Table S3.** Anthropometric measures before and after treatment with dopamine receptor antagonists in patients with prolactinomas.

| Study (Ref.nr.)  | Weight baseline, Kg (SD) | Weight follow-up, Kg (SD) | BMI baseline (SD) | BMI follow-up (SD) | Waist-hip ratio baseline (SD) | Waist-hip ratio follow-up (SD) | WC baseline, cm (SD) | WC follow-up, cm (SD) |
|------------------|--------------------------|---------------------------|-------------------|--------------------|-------------------------------|--------------------------------|----------------------|-----------------------|
| Schwetz (25)     | -                        | -                         | 27.9 (5.9)        | 28.6 (5.6)         | -                             | -                              | -                    | -                     |
| Auriemma II (26) | 96.1 (12.2)              | 88.8 (10.3)               | 31.7 (3.9)        | 29.3 (3.4)         | -                             | -                              | 105(10.1)            | 101 (10.3)            |
| Medic (31)       | -                        | -                         | 24 (6.4)          | 22.8 (6.1)         | -                             | -                              | -                    | -                     |
| Pala (27)        | 57.3 (9.5)               | 54.8 (9.2)                | 24.2 (4.0)        | 23.2 (3.9)         | 0.90 (0.06)                   | 0.90 (0.07)                    | 85.3 (12.0)          | 82.3 (10.0)           |
| Barbosa (33)     | -                        | -                         | 29.3 (15.4)       | 28.4 (14.5)        | -                             | -                              | 88.3 (11.8)          | 89.8 (11.3)           |
| Auriemma (5)     | 75.6 (18.4)              | 69.6 (15.6)               | 27.6 (5.3)        | 24.3 (4.7)         | -                             | -                              | 88.7 (14.6)          | 73.4 (5.9)            |
| Ciresi (4)       | -                        | -                         | 25.6 (5.2)        | 25.4 (5.0)         | -                             | -                              | 88.8 (10.5)          | 87.1 (10.2)           |
| Inancli (29)     | -                        | -                         | 27.1 (5.9)        | 26.7 (5.6)         | -                             | -                              | -                    | -                     |
| Berinder (6)     | 78.5 (28.5)              | 75.5 (23.3)               | 25.8 (7.8)        | 25.3 (7.2)         | 0.87 (0.10)                   | 0.87 (0.10)                    | 90.2 (12.5)          | 87.7 (8.8)            |
| Silva (8)        | -                        | -                         | 29.2 (15.3)       | 28.4 (14.5)        | -                             | -                              | 87.3 (12.5)          | 84.3 (11.2)           |
| Serri (7)        | 82.5 (20.5)              | 82.5 (20.5)               | 29.0 (6.0)        | -                  | -                             | -                              | -                    | -                     |
| Yavuz (28)       | -                        | -                         | 26.3 (5.3)        | 25.0 (5.3)         | 0.83 (0.06)                   | 0.82 (0.06)                    | -                    | -                     |
| Doknic (30)      | 85.8 (17.4)              | 80.8 (16)                 | 27.5 (3.4)        | 26.0 (3.1)         | -                             | -                              | -                    | -                     |
| Iglesias (32)    | -                        | -                         | 31.3 (5.1)        | -                  | -                             | -                              | -                    | -                     |

(-) Not reported, WC: waist circumference
