# Supplementary material for: Metabolic effects of dopamine agonists in patients with prolactinomas: a systematic review and meta-analysis
Source: PubMed Central journal article supplement — Endocr Connect. 2019 Sep 13;8(10):1395–404. doi: 10.1530/EC-19-0286 (PMC6826167; doi:10.1530/ec-19-0286), 2019-09-13
Supplement: supplementary_table_4.pdf [file supplementary_table_4.pdf]

**Table S4.** Glycaemic variables before and after treatment with dopamine receptor antagonists in patients with prolactinomas.

| Study (Ref.nr.)         | Study              | P-glucose<br>baseline,<br>mmol/L (SD) | P-glucose<br>follow-up,<br>mmol/L (SD) | HbA1c baseline,<br>mmol/mol (SD) | HbA1c<br>follow-up,<br>mmol/mol<br>(SD) | HOMA-IR<br>baseline (SD) | HOMA-IR<br>follow-up<br>(SD) | Fasting p-insulin<br>baseline, pmol/L<br>(SD) | Fasting p-<br>insulin<br>follow-up,<br>pmol/ L (SD) |
|-------------------------|--------------------|---------------------------------------|----------------------------------------|----------------------------------|-----------------------------------------|--------------------------|------------------------------|-----------------------------------------------|-----------------------------------------------------|
| <b>Schwetz (25)</b>     | <b>Schwetz</b>     | 4.9 (0.2)                             | 4.8 (0.1)                              | 36.8 (2.2)                       | 34.8 (5.2)                              | -                        | -                            | -                                             | -                                                   |
| <b>Auriemma II (26)</b> | <b>Auriemma II</b> | 5.3 (1.3)                             | 5.2 (0.4)                              | -                                | -                                       | 4.1 (2.2)                | 1.8 (1.1)                    | 119(47.2)                                     | 54.2 (29.2)                                         |
| <b>Medic (31)</b>       | <b>Medic</b>       | -                                     | -                                      | -                                | -                                       | -                        | -                            | -                                             | -                                                   |
| <b>Pala (27)</b>        | <b>Pala</b>        | 4.8 (0.5)                             | 4.3 (0.3)                              | -                                | -                                       | 1.1 (1.3)                | 1.0 (0.5)                    | 288 (379.2)                                   | 224(145.1)                                          |
| <b>Barbosa (33)</b>     | <b>Barbosa</b>     | 6.3 (2.6)                             | 5.3 (2.1)                              | -                                | -                                       | 5.9 (5.0)                | 4.6 (3.8)                    | 125 (92.0)                                    | 96.5 (64.2)                                         |
| <b>Auriemma (5)</b>     | <b>Auriemma</b>    | 5.0 (0.7)                             | 4.7 (0.8)                              | -                                | -                                       | 3.2 (2.1)                | 1.2 (0.8)                    | 96.5 (54.7)                                   | 38.3 (21.9)                                         |
| <b>Ciresi (4)</b>       | <b>Ciresi</b>      | 5.2 (0.8)                             | 5.3 (1.0)                              | 35.5 (16.9)                      | 33.3 (19.1)                             | 3.9 (1.5)                | 2.9 (1.0)                    | 118 (46.9)                                    | 86.4 (25.9)                                         |
| <b>Inancli (29)</b>     | <b>Inancli</b>     | -                                     | -                                      | -                                | -                                       | 1.8 (1.07)               | 1.6 (1.0)                    | -                                             | -                                                   |
| <b>Berinder (6)</b>     | <b>Berinder</b>    | 6.5 (1.9)                             | 5.2 (0.6)                              | 34.4 (11.5)                      | 26.8 (8.2)                              | 3.3 (2.3)                | 2.1 (0.7)                    | 60.0 (27.0)                                   | 64.3 (23.3)                                         |
| <b>Silva (8)</b>        | <b>Silva</b>       | 6.3 (2.6)                             | 5.2 (2.1)                              | -                                | -                                       | 5.8 (4.0)                | 4.6 (3.8)                    | 125 (92)                                      | 98.6 (66.0)                                         |
| <b>Serri (7)</b>        | <b>Serri</b>       | 4.8 (0.3)                             | 4.8 (0.4)                              | -                                | -                                       | 4.5 (1.9)                | 4.17 (1.6)                   | 151 (61.1)                                    | 140 (52.5)                                          |
| <b>Yavuz (28)</b>       | <b>Yavuz</b>       | 4.4 (0.5)                             | 4.2 (0.5)                              | -                                | -                                       | 2.1 (1.1)                | 1.5 (0.4)                    | 75.7 (35.4)                                   | 56.6 (18.8)                                         |
| <b>Doknic (30)</b>      | <b>Doknic</b>      | -                                     | -                                      | -                                | -                                       | -                        | -                            | -                                             | -                                                   |
| <b>Iglesias (32)</b>    | <b>Iglesias</b>    | 5.2 (0.7)                             | 5.2 (0.7)                              | -                                | -                                       | -                        | -                            | -                                             | -                                                   |

(-) Not reported
