# Supplementary material for: Metabolic effects of dopamine agonists in patients with prolactinomas: a systematic review and meta-analysis
Source: PubMed Central journal article supplement — Endocr Connect. 2019 Sep 13;8(10):1395–404. doi: 10.1530/EC-19-0286 (PMC6826167; doi:10.1530/ec-19-0286), 2019-09-13
Supplement: supplementary_table_5.pdf [file supplementary_table_5.pdf]

Dopamine agonists in prolactinoma

**Table S5.** Sex steroids before and after treatment with dopamine receptor antagonists in patients with prolactinomas.

| Study (Ref.nr.)         | Testosterone baseline, nmol/L (SD) | Estradiol or estrogen baseline (SD) | Estradiol or estrogen at follow-up (SD) | FSH baseline, IU/L (SD) | FSH at follow-up, IU/L (SD) | LH baseline, IU/L (SD) | LH at follow-up, IU/L (SD) | Hypogonadism, % | Estrogen- or testosterone replacement at baseline (n) |
|-------------------------|------------------------------------|-------------------------------------|-----------------------------------------|-------------------------|-----------------------------|------------------------|----------------------------|-----------------|-------------------------------------------------------|
| <b>Schwetz (25)</b>     | 6.7 (1.0)                          | 20.7 (16.7) <sup>1</sup>            | 51.1 (18) <sup>1</sup>                  | 4.43 (3.33)             | 5.28 (4.67)                 | 1.8 (1.78)             | 2.18 (2.44)                | 72              | -                                                     |
| <b>Auriemma II (26)</b> | 7.5 (4.6)                          | -                                   | -                                       | -                       | -                           | -                      | -                          | 69              | 0                                                     |
| <b>Medic (31)</b>       | -                                  | -                                   | -                                       | -                       | -                           | -                      | -                          | 95              | -                                                     |
| <b>Pala (27)</b>        | -                                  | 52.7 (24.3) <sup>1</sup>            | 63.4 (167.4) <sup>1</sup>               | 5.7 (2.6)               | 5.8 (1.8)                   | 5.3 (4.4)              | 5.2 (1.5)                  | 72              | -                                                     |
| <b>Barbosa (33)</b>     | -                                  | -                                   | -                                       | -                       | -                           | -                      | -                          | 63 (F), 100 (M) | -                                                     |
| <b>Auriemma (5)</b>     | -                                  | -                                   | -                                       | -                       | -                           | -                      | -                          | -               | -                                                     |
| <b>Ciresi (4)</b>       | -                                  | -                                   | -                                       | -                       | -                           | -                      | -                          | -               | -                                                     |
| <b>Inancli (29)</b>     | -                                  | -                                   | -                                       | -                       | -                           | -                      | -                          | -               | -                                                     |
| <b>Berinder (6)</b>     | 4.6 (2.3)                          | -                                   | -                                       | -                       | -                           | -                      | -                          | 100             | 50 (F), 33 (M)                                        |
| <b>Silva (8)</b>        | -                                  | -                                   | -                                       | -                       | -                           | -                      | -                          | 74              | -                                                     |
| <b>Serri (7)</b>        | -                                  | -                                   | -                                       | -                       | -                           | -                      | -                          | 100             | 0                                                     |
| <b>Yavuz (28)</b>       | -                                  | 50.1 (19.2) <sup>2</sup>            | 129.9 (60.8) <sup>2</sup>               | -                       | -                           | -                      | -                          | 44              | -                                                     |
| <b>Doknic (30)</b>      | -                                  | -                                   | -                                       | -                       | -                           | -                      | -                          | -               | -                                                     |
| <b>Iglesias (32)</b>    | 9.2 (5.6)                          | -                                   | -                                       | 2.15 (1.19)             | 2.75 (1.93)                 | 1.9 (1.78)             | 2.73 (2.3)                 | -               | -                                                     |

(-) Not reported

M: Male

F: Female

<sup>1</sup> nmol/ L

<sup>2</sup> ng/ mL
