# Supplementary material for: Metabolic effects of dopamine agonists in patients with prolactinomas: a systematic review and meta-analysis
Source: PubMed Central journal article supplement — Endocr Connect. 2019 Sep 13;8(10):1395–404. doi: 10.1530/EC-19-0286 (PMC6826167; doi:10.1530/ec-19-0286), 2019-09-13
Supplement: supplementary_table_6.pdf [file supplementary_table_6.pdf]

## Dopamine agonists in prolactinoma

**Table S6.** hsCRP, blood pressure and lipids before and after treatment with dopamine receptor antagonists in patients with prolactinomas.

| Study (Ref.nr.)  | hsCRP baseline, mg/L (SD) | hsCRP follow-up, mg/L (SD) | Systolic BP baseline, mmHg (SD) | Systolic BP follow-up, mmHg (SD) | Diastolic BP baseline, mmHg (SD) | Diastolic BP follow-up, mmHg (SD) | Total cholesterol Baseline, mmol/L (SD) | Total cholesterol follow-up, mmol/L (SD) | LDL baseline, mmol/L (SD) | LDL follow-up, mmol/L (SD) | P-TRG baseline, mmol/L (SD) | P-TRG follow-up mmol/L (SD) |
|------------------|---------------------------|----------------------------|---------------------------------|----------------------------------|----------------------------------|-----------------------------------|-----------------------------------------|------------------------------------------|---------------------------|----------------------------|-----------------------------|-----------------------------|
| Schwetz (25)     | -                         | -                          | -                               | -                                | -                                | -                                 | 5.1 (1.4)                               | 4.8 (0.9)                                | 3.1 (1.0)                 | 2.9 (1.0)                  | 1.1 (0.8)                   | 1.1 (0.6)                   |
| Auriemma II (26) | -                         | -                          | -                               | -                                | -                                | -                                 | 5.7 (0.8)                               | 5 (0.9)                                  | 3.7 (0.8)                 | 3.2 (0.8)                  | 2.1 (1)                     | 1.3 (0.5)                   |
| Medic (31)       | -                         | -                          | 113 (26.3)                      | 112 (21.5)                       | 76.1 (17.7)                      | 75.1 (15.1)                       | 5.1 (1.5)                               | 4.4 (1.3)                                | 3.3 (1.2)                 | 2.7 (0.8)                  | 1.0 (0.5)                   | 1.0 (0.6)                   |
| Pala (27)        | -                         | -                          | -                               | -                                | -                                | -                                 | 4.5 (1)                                 | 3.6 (0.5)                                | 2.8 (0.9)                 | 2.0 (0.3)                  | 1.8 (0.4)                   | 1.2 (0.2)                   |
| Barbosa (33)     | -                         | -                          | -                               | -                                | -                                | -                                 | -                                       | -                                        | 3.4 (1.0)                 | 2.7 (1.2)                  | 1.6 (0.8)                   | 1.5 (0.8)                   |
| Auriemma (5)     | -                         | -                          | -                               | -                                | -                                | -                                 | 5.1 (0.8)                               | 4.4 (0.7)                                | 3.3 (0.9)                 | 2.5 (0.7)                  | 1.4 (0.8)                   | 0.9 (0.4)                   |
| Ciresi (4)       | -                         | -                          | -                               | -                                | -                                | -                                 | 4.7 (1)                                 | 4.3 (0.7)                                | 2.9 (0.9)                 | 2.4 (0.7)                  | 1.4 (0.7)                   | 1.3 (0.5)                   |
| Inancli (29)     | 3.5 (7.9)                 | 1.2 (2.2)                  | -                               | -                                | -                                | -                                 | 4.5 (0.8)                               | 4.1 (1.1)                                | 2.8 (0.7)                 | 2.4 (0.9)                  | -                           | -                           |
| Berinder (6)     | 3.6 (8.4)                 | 4.1 (10.1)                 | 122 (19.0)                      | -                                | 76 (9)                           | -                                 | 5.4 (1)                                 | 4.8 (0.8)                                | 3.4 (0.9)                 | 2.9 (0.6)                  | 1.7 (1.9)                   | 1.2 (0.8)                   |
| Silva (8)        | -                         | -                          | -                               | -                                | -                                | -                                 | -                                       | -                                        | 3.4 (1.0)                 | 2.8 (0.6)                  | 1.5 (0.8)                   | 1.5 (2.5)                   |
| Serri (7)        | 2.4 (3.3)                 | 1.7 (2.4)                  | -                               | -                                | -                                | -                                 | 4.5 (1.1)                               | 4.4 (0.8)                                | 2.9 (0.8)                 | 2.7 (0.8)                  | 1.3 (1.0)                   | 1.3 (0.9)                   |
| Yavuz (28)       | 3.5 (0.5)                 | 2.5 (1.3)                  | 123 (12.2)                      | 121 (13.6)                       | 75.3 (9.7)                       | 75.9 (8.9)                        | 5.1 (0.8)                               | 4.8 (1)                                  | 3.2 (0.8)                 | 3.0 (0.9)                  | 1.0 (0.3)                   | 0.9 (0.3)                   |
| Doknic (30)      | -                         | -                          | -                               | -                                | -                                | -                                 | -                                       | -                                        | -                         | -                          | -                           | -                           |
| Iglesias (32)    | -                         | -                          | -                               | -                                | -                                | -                                 | 5.5 (1.1)                               | 5.1 (0.8)                                | -                         | -                          | 1.5 (1.0)                   | 1.4 (0.7)                   |

(-) Not reported
