# Supplementary material for: Metabolic effects of dopamine agonists in patients with prolactinomas: a systematic review and meta-analysis
Source: PubMed Central journal article supplement — Endocr Connect. 2019 Sep 13;8(10):1395–404. doi: 10.1530/EC-19-0286 (PMC6826167; doi:10.1530/ec-19-0286), 2019-09-13
Supplement: supplementary_table_7.pdf [file supplementary_table_7.pdf]

## Dopamine agonists in prolactinoma

**Table S7.** Drop out, adverse events and notes for included studies.

| Study (Ref.nr.)  | Drop out, n (total)  | DA adverse effects                            |
|------------------|----------------------|-----------------------------------------------|
| Schwetz (25)     | 0 (53)               | -                                             |
| Auriemma II (26) | 0 (32)               | -                                             |
| Medic (31)       | 0 (20)               | -                                             |
| Pala (27)        | 9 <sup>4</sup> (28)  | -                                             |
| Barbosa (33)     | 14 <sup>1</sup> (35) | Gastrointestinal intolerance (n=5).           |
| Auriemma (5)     | 0 (61)               | -                                             |
| Ciresi (4)       | 0 (43)               | -                                             |
| Inancli (29)     | 0 (21)               | -                                             |
| Berinder (6)     | 1 <sup>2</sup> (15)  | -                                             |
| Silva (8)        | 13 <sup>3</sup> (35) | -                                             |
| Serri (7)        | -                    | None                                          |
| Yavuz (28)       | 0 (16)               | Nausea, dizziness, sleep disturbances (n=14). |
| Doknic (30)      | 0 (23)               | -                                             |
| Iglesias (32)    | 0 (27)               | -                                             |

(-) Not reported

<sup>1</sup> Ten patients were excluded due to their discontinuation of DA use because of irregular drug supply, two became pregnant, one did not complete the six-month sleep study, and one was submitted to transsphenoidal surgery due to a macroprolactinoma resistant to DA.

<sup>2</sup> Pregnancy

<sup>3</sup> Ten patients were excluded due to their discontinuation of DA use because of irregular drug supply, two became pregnant and one was submitted to transsphenoidal surgery due to a macroprolactinoma resistant to DA.

<sup>4</sup> Four women became pregnant, four women lost to follow-up, one man excluded (no reason given).

Dopamine agonists in prolactinoma
